# Supplementary material
Source: publisher figshare collection journal article supplement (https://tandf.figshare.com/ndownloader/files/14502644)
Supplement: Supplementary file 1 [file 14502644]

**Association between greenhouse working exposure and bronchial asthma: a pilot, cross-sectional survey of 5420 greenhouse farmers from northeast China**

**Shuo Liu, M.D.1,2,3, Paul J. Wolters, M.D.3, Yibing Zhang4, Mingjing Zhao2, Dan Liu2, Lingling Wang2, Guangdan Zhao2, Shitao Mao2, Lijian Wu2, Hongwen Zhao, M.D.1,*, and Xiaoge Wang, M.D.2,***

Supplementary Table 1: The occurrence (n) and frequency (%) of extra-pulmonary clinical manifestations of 1040 greenhouse workers with asthma, by cultivation type.

| Greenhouse variables | Vegetable  n (%) | Poultry  n (%) | Mushroom  n (%) | Flower  n (%) | Total  n (%) |
| --- | --- | --- | --- | --- | --- |
| Total subjects | 439 (42.2) | 160 (15.4) | 218 (21.0) | 223 (21.4) | 1040 |
| Arthritis or joint abnormalities | 12 (2.7) | 6 (3.8) | 10 (4.6) | 12 (5.4) | 40 (3.8) |
| Pain in the neck, loins, or knees | 64 (14.6) | 19 (11.9) | 23 (10.6) | 36 (16.1) | 142 (13.7) |
| Ocular diseases | 3 (0.7) | 2 (1.3) | 6 (2.8) | 4 (1.8) | 15 (1.4) |
| Allergic dermatosis | 30 (6.8) | 25 (15.6) | 35 (16.1) | 17 (7.6) | 107 (10.3) |
| Varicose vein | 6 (1.4) | 5 (3.1) | 1 (0.5) | 5 (2.2) | 17 (1.6) |
